# Supplementary material
Source: PubMed Central journal article supplement (PMC7423681)
Supplement: rspb20201053supp3.pdf [file rspb20201053supp3.pdf]

## Supplemental Materials

Table S2. Phylogenetic ANOVA results from each linear trait. Last three columns summarize pairwise differences between habitat regimes and associated p-values. Bolded habitat comparisons are considered statistically significant ( $p < 0.05$ ).

| Trait                    | Sum sq | R sq  | F-value | Z-score | P-value | Habitats                  | pairwise P-value |
|--------------------------|--------|-------|---------|---------|---------|---------------------------|------------------|
| Standard length          | 0.003  | 0.001 | 1.7     | 0.89    | 0.18    | demersal – benthic        | 0.739            |
|                          |        |       |         |         |         | pelagic – benthic         | 0.1141           |
|                          |        |       |         |         |         | pelagic – demersal        | 0.0702           |
| Max body depth           | 0.006  | 0.003 | 4.21    | 1.56    | 0.02    | demersal – benthic        | 0.2833           |
|                          |        |       |         |         |         | pelagic – benthic         | 0.2062           |
|                          |        |       |         |         |         | <b>pelagic – demersal</b> | <b>0.0076</b>    |
| Max fish width           | 0.002  | 0.001 | 1.26    | 0.66    | 0.27    | demersal – benthic        | 0.1578           |
|                          |        |       |         |         |         | pelagic – benthic         | 0.7152           |
|                          |        |       |         |         |         | pelagic – demersal        | 0.36             |
| Head depth               | 0.033  | 0.009 | 14.55   | 2.48    | 0       | <b>demersal – benthic</b> | <b>1e-04</b>     |
|                          |        |       |         |         |         | <b>pelagic – benthic</b>  | <b>0.0297</b>    |
|                          |        |       |         |         |         | <b>pelagic – demersal</b> | <b>0.0382</b>    |
| Lower jaw length         | 0.012  | 0.001 | 1.59    | 0.84    | 0.19    | demersal – benthic        | 0.0779           |
|                          |        |       |         |         |         | pelagic – benthic         | 0.1397           |
|                          |        |       |         |         |         | pelagic – demersal        | 0.799            |
| Mouth width              | 0.013  | 0.001 | 1.08    | 0.53    | 0.32    | demersal – benthic        | 0.1534           |
|                          |        |       |         |         |         | pelagic – benthic         | 0.1952           |
|                          |        |       |         |         |         | pelagic – demersal        | 0.7225           |
| Min caudalpeduncle depth | 0.03   | 0.002 | 3.64    | 1.47    | 0.03    | <b>demersal – benthic</b> | <b>0.0323</b>    |
|                          |        |       |         |         |         | pelagic – benthic         | 0.6926           |
|                          |        |       |         |         |         | pelagic – demersal        | 0.0824           |
| Min caudalpeduncle width | 0.022  | 0.001 | 1.23    | 0.63    | 0.28    | demersal – benthic        | 0.4179           |
|                          |        |       |         |         |         | pelagic – benthic         | 0.6219           |
|                          |        |       |         |         |         | pelagic – demersal        | 0.1529           |

Table S3. Comparisons of two evolutionary model fits for each linear trait averaged over 100 replications. In every case, the multi-rate Brownian motion model (BMS) is a better fit. delta AICc is the difference in AICc between the model and the best-fit model.

| Trait                    | Model      | AICc  | $\Delta$ AICc | lnl   | $\sigma_{\text{Benthic}}$ | $\sigma_{\text{Demersal}}$ | $\sigma_{\text{Pelagic}}$ |
|--------------------------|------------|-------|---------------|-------|---------------------------|----------------------------|---------------------------|
| Head depth               | BM1        | -2826 | 22            | 1415  | 0.113                     | 0.113                      | 0.113                     |
|                          | <b>BMS</b> | -2848 | 0             | 1428  | 0.125                     | 0.103                      | 0.115                     |
| Lower jaw length         | BM1        | 1334  | 123           | -665  | 0.392                     | 0.392                      | 0.392                     |
|                          | <b>BMS</b> | 1211  | 0             | -601  | 0.260                     | 0.494                      | 0.364                     |
| Max body depth           | BM1        | -4339 | 103           | 2171  | 0.072                     | 0.072                      | 0.072                     |
|                          | <b>BMS</b> | -4442 | 0             | 2225  | 0.094                     | 0.056                      | 0.071                     |
| Max fish width           | BM1        | -4253 | 42            | 2128  | 0.074                     | 0.074                      | 0.074                     |
|                          | <b>BMS</b> | -4295 | 0             | 2151  | 0.085                     | 0.075                      | 0.053                     |
| Min caudalpeduncle depth | BM1        | 1529  | 452           | -763  | 0.416                     | 0.416                      | 0.416                     |
|                          | <b>BMS</b> | 1077  | 0             | -535  | 0.753                     | 0.261                      | 0.243                     |
| Min caudalpeduncle width | BM1        | 4032  | 52            | -2014 | 0.879                     | 0.879                      | 0.879                     |
|                          | <b>BMS</b> | 3980  | 0             | -1986 | 1.112                     | 0.800                      | 0.698                     |
| Mouth width              | BM1        | 2656  | 82            | -1326 | 0.583                     | 0.583                      | 0.583                     |
|                          | <b>BMS</b> | 2574  | 0             | -1283 | 0.406                     | 0.638                      | 0.729                     |
| Standard length          | BM1        | -4054 | 91            | 2029  | 0.078                     | 0.078                      | 0.078                     |
|                          | <b>BMS</b> | -4145 | 0             | 2076  | 0.100                     | 0.060                      | 0.086                     |

Table S4. Average independent contrast for habitat transitions and traits that significantly differed from zero ( $p < 0.05$ ) across 100 simmaps. “n” is the number of simmaps in which the trait and transition combination were significant. Results are only reported for those relationships that are significant in over 50% of the simmaps. Negative values of the average contrast indicate that the trait decreased at the transition, more than it increased.

| Trait                    | $Habitat_{From}$ | $Habitat_{To}$ | Average PIC | n  |
|--------------------------|------------------|----------------|-------------|----|
| Head depth               | demersal         | benthic        | -0.0209     | 87 |
| Min caudalpeduncle depth | demersal         | benthic        | -0.0338     | 65 |
| Head depth               | benthic          | demersal       | 0.0085      | 96 |
| Max body depth           | demersal         | pelagic        | -0.0051     | 88 |
| Max fish width           | benthic          | pelagic        | -0.0134     | 67 |
| Standard length          | demersal         | pelagic        | 0.0052      | 91 |

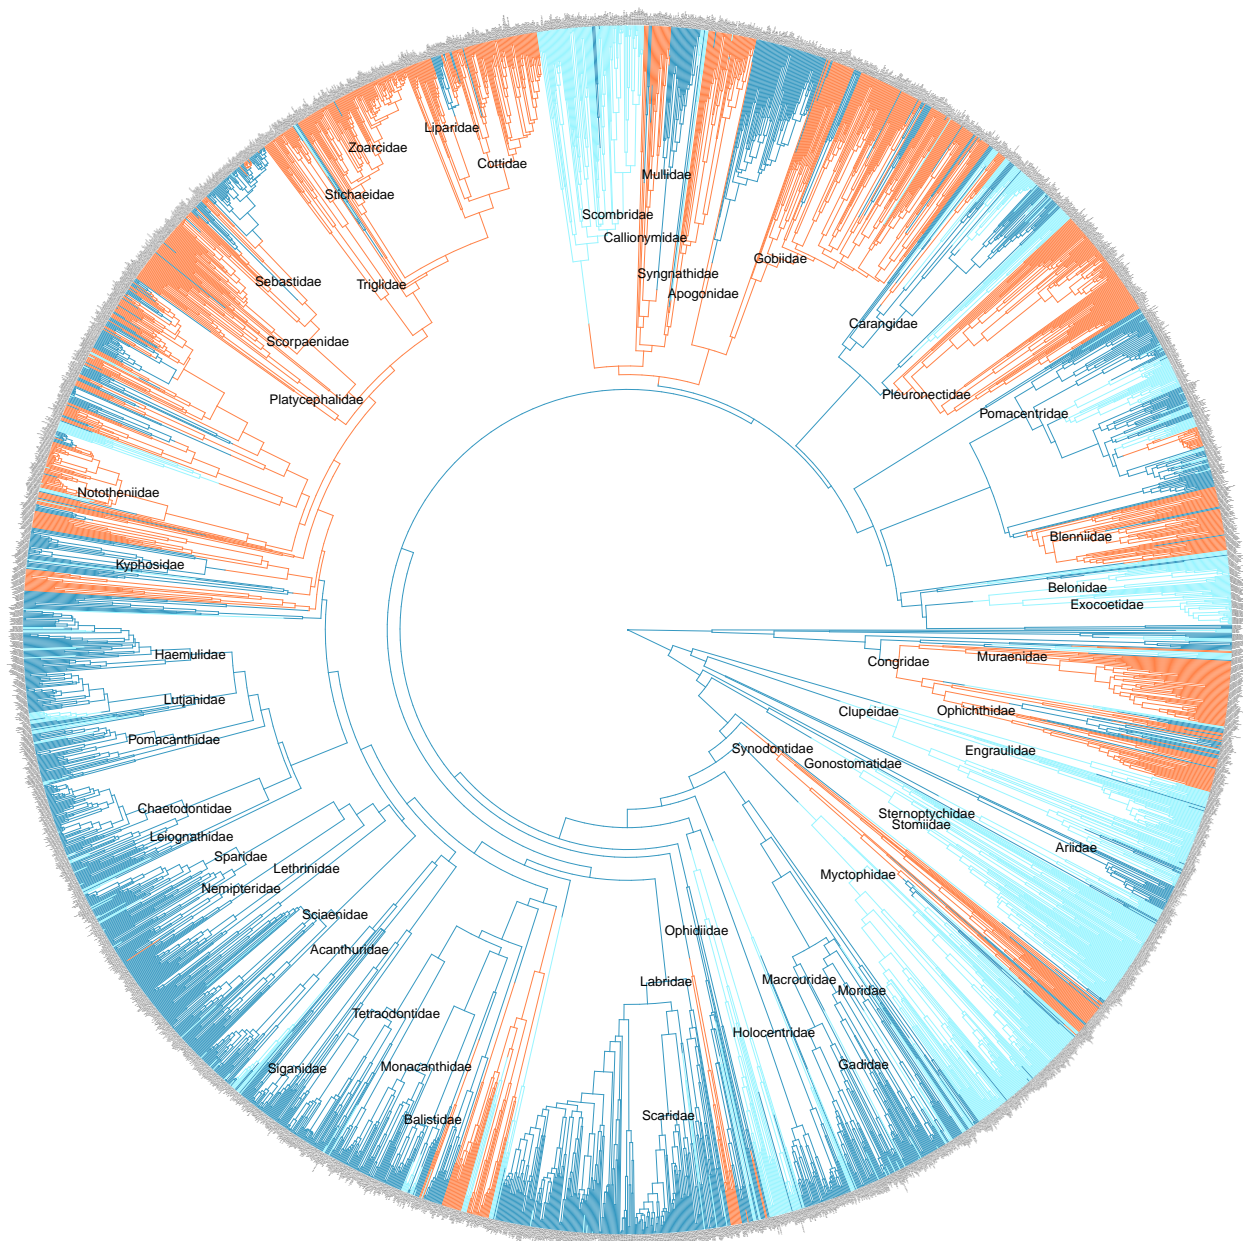

Figure S1: Representative stochastic character reconstruction showing habitat transitions across the phylogeny (benthic: orange; demersal: dark blue; pelagic: light blue). Names of families with more than 15 species present are printed at the node corresponding to the most recent common ancestor.

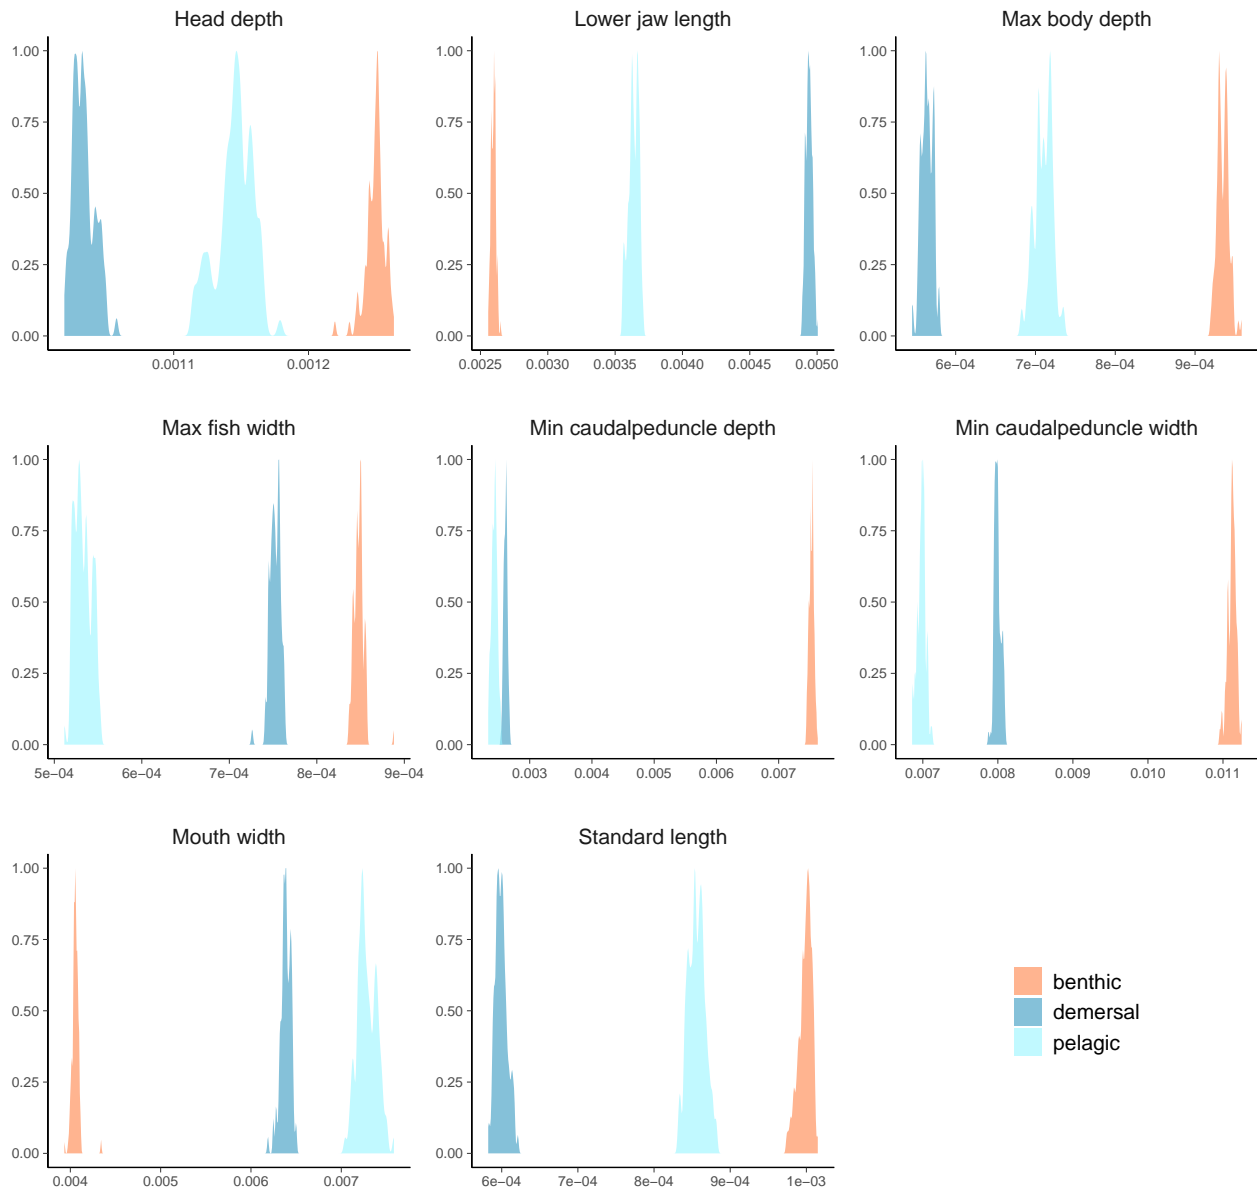

Rate of Morphological Evolution

Figure S2: Plot summarizing the rate estimates from the OUwie analysis for each habitat and trait under the best fit model (BMS) across the 100 stochastic character maps.

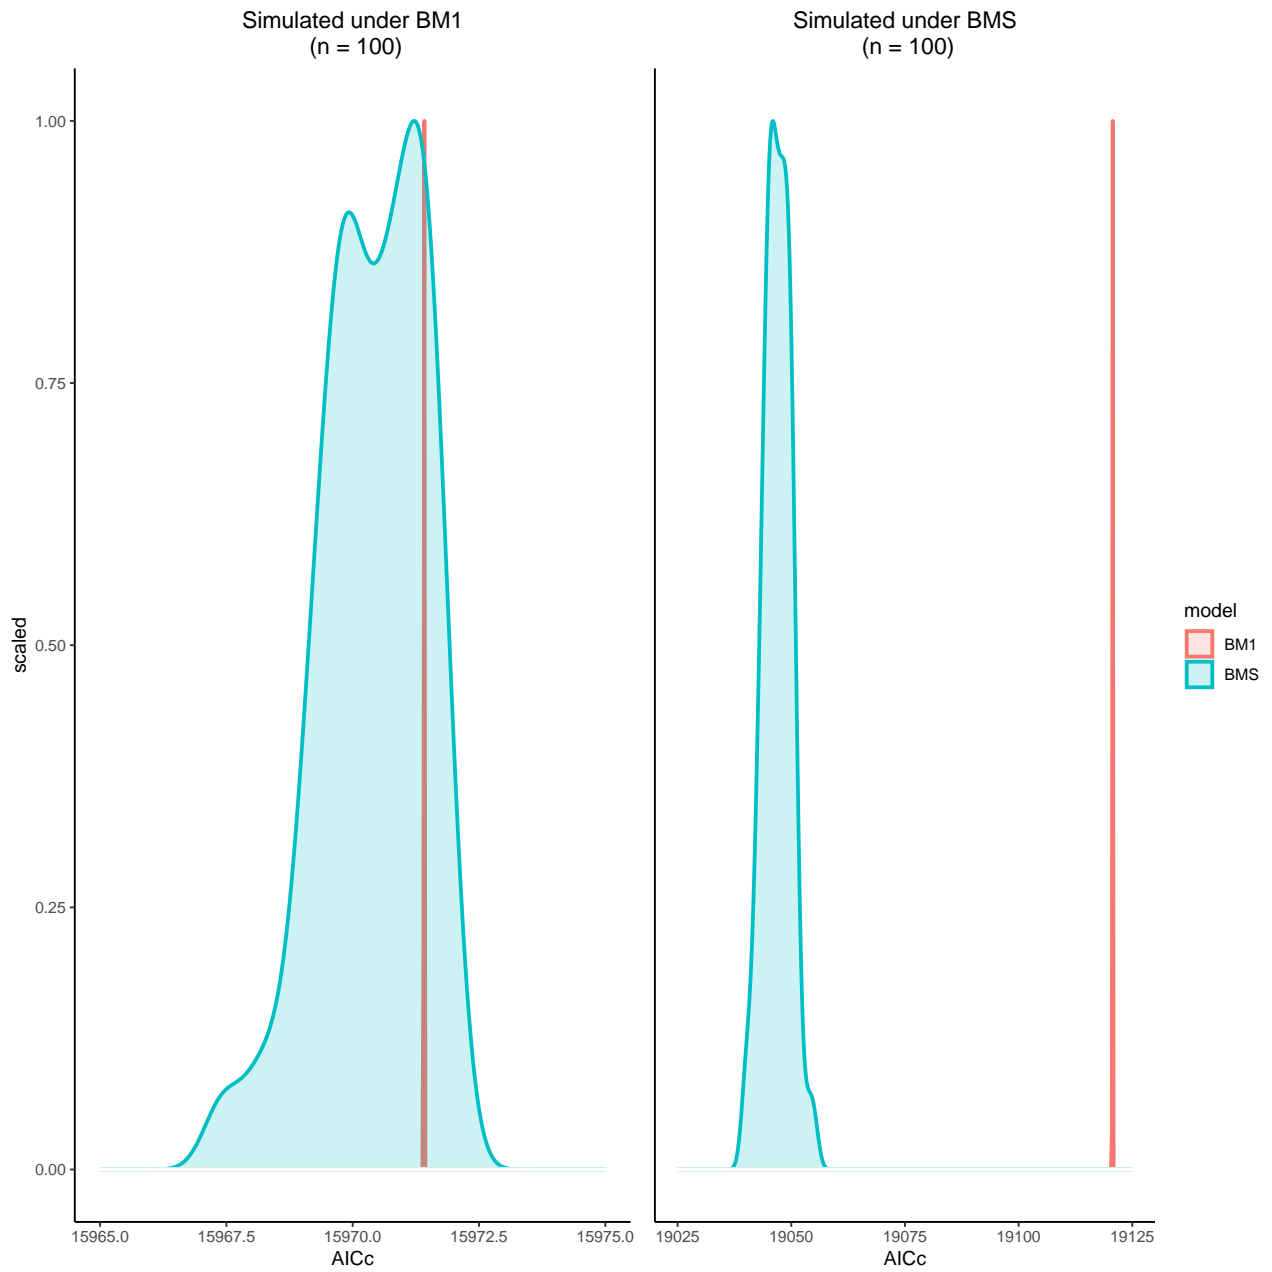

Figure S3: Plot summarizing the AICc estimates from the OUwie simulations under BM1 (left) and BMS (right) across the 100 stochastic character maps.

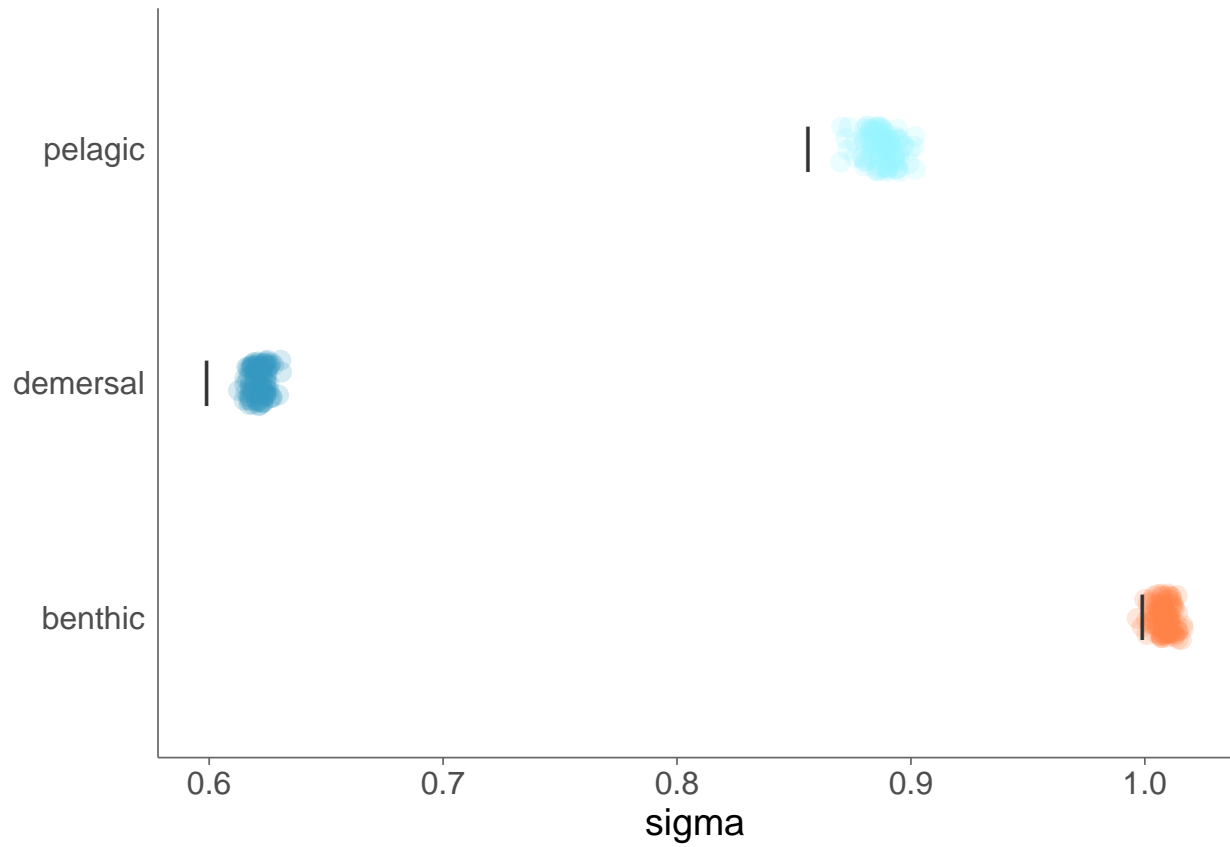

Figure S4: Distribution of sigma values by habitat for best-fit evolutionary models (all BMS) over 100 simulations. The horizontal black lines designate the original sigma under which datasets were simulated.
